# Supplementary material
Source: PubMed Central journal article supplement (PMC9187594)
Supplement: NIHMS1800455-supplement-1.pdf [file NIHMS1800455-supplement-1.pdf]

Supplemental Table 1: Association between history of endometriosis and adverse pregnancy outcomes among deliveries by all women aged  $\geq 18$  in Massachusetts between October 1, 2013-December 31, 2017, stratified by history of subfertility/infertility treatment

|                                              | No history of endometriosis |      | History of endometriosis |      | aRR (95% CI) <sup>1</sup> | P-value, test for heterogeneity <sup>2</sup> |
|----------------------------------------------|-----------------------------|------|--------------------------|------|---------------------------|----------------------------------------------|
|                                              | n                           | %    | n                        | %    |                           |                                              |
| <b>Gestational Diabetes</b>                  |                             |      |                          |      |                           |                                              |
| Non-infertile                                | 5,101                       | 7.3  | 35                       | 6.3  | 0.85 (0.62-1.18)          | 0.63                                         |
| Subfertility/infertility                     | 1,207                       | 9.3  | 33                       | 7.1  | 0.74 (0.53-1.04)          |                                              |
| ART                                          | 751                         | 10.5 | 53                       | 9.9  | 0.91 (0.70-1.18)          |                                              |
| <b>PIH/Eclampsia/Preeclampsia</b>            |                             |      |                          |      |                           |                                              |
| Non-infertile                                | 6,804                       | 9.7  | 71                       | 12.7 | 1.20 (0.97-1.50)          | 0.17                                         |
| Subfertility/infertility                     | 1,455                       | 11.2 | 53                       | 11.4 | 1.01 (0.78-1.30)          |                                              |
| ART                                          | 1,181                       | 16.5 | 89                       | 16.6 | 1.15 (0.97-1.35)          |                                              |
| <b>Cesarean Section<sup>3</sup></b>          |                             |      |                          |      |                           |                                              |
| Non-infertile                                | 20,560                      | 29.3 | 198                      | 35.5 | 1.18 (1.06-1.32)          | 0.52                                         |
| Subfertility/infertility                     | 4,696                       | 36.2 | 186                      | 39.9 | 1.08 (0.96-1.21)          |                                              |
| ART                                          | 3,421                       | 47.8 | 296                      | 55.1 | 1.17 (1.09-1.26)          |                                              |
| <b>Placental abnormalities</b>               |                             |      |                          |      |                           |                                              |
| Non-infertile                                | 1,696                       | 2.4  | 16                       | 2.9  | 1.25 (0.74-2.04)          | 0.02                                         |
| Subfertility/infertility                     | 414                         | 3.2  | <11                      | 2.1  | --                        |                                              |
| ART                                          | 433                         | 6.1  | 54                       | 10.1 | 1.01 (0.69-1.49)          |                                              |
| <b>Small for gestational age<sup>4</sup></b> |                             |      |                          |      |                           |                                              |
| Non-infertile                                | 4,763                       | 6.9  | 33                       | 6.0  | 0.88 (0.63-1.24)          | 0.43                                         |
| Subfertility/infertility                     | 998                         | 7.7  | 37                       | 8.0  | 1.06 (0.77-1.47)          |                                              |
| ART                                          | 1,752                       | 22.4 | 45                       | 7.6  | 0.79 (0.58-1.07)          |                                              |
| <b>Low Birthweight (&lt;2500 grams)</b>      |                             |      |                          |      |                           |                                              |

|                                                       |       |      |     |      |                  |      |
|-------------------------------------------------------|-------|------|-----|------|------------------|------|
| Non-infertile                                         | 3,530 | 5.0  | 31  | 5.5  | 1.21 (0.85-1.73) |      |
| Subfertility/infertility                              | 1,088 | 8.2  | 37  | 7.8  | 1.13 (0.84-1.54) | 0.44 |
| ART                                                   | 1,370 | 17.0 | 122 | 20.1 | 1.16 (0.99-1.37) |      |
| <b>Preterm Birth (&lt;37 weeks)</b>                   |       |      |     |      |                  |      |
| Non-infertile                                         | 4,222 | 6.0  | 40  | 7.2  | 1.24 (0.91-1.67) |      |
| Subfertility/infertility                              | 1,275 | 9.6  | 44  | 9.4  | 1.08 (0.81-1.44) | 0.51 |
| ART                                                   | 1,595 | 20.0 | 139 | 23.1 | 1.16 (0.99-1.36) |      |
| <b>Neonatal prolonged hospital stay<sup>4,5</sup></b> |       |      |     |      |                  |      |
| Non-infertile                                         | 2,620 | 3.8  | 21  | 3.9  | 1.01 (0.66-1.54) |      |
| Subfertility/infertility                              | 610   | 4.8  | 23  | 5.1  | 1.14 (0.75-1.74) | 0.89 |
| ART                                                   | 673   | 9.2  | 47  | 8.8  | 0.97 (0.71-1.32) |      |

1. Crude and adjusted relative risk approximated using general estimating equations with a log link and poisson distribution to take into account multiple deliveries by the same women; multivariate models adjusted for maternal age (continuous), body mass index (<25.0, 25.0+, unknown), race (non-Hispanic White, other race/ethnicity, unknown), education (high school + some college, completed college, unknown), plurality (singleton, multiples), and birth year (2013-2017 ordinal categorical variable).

2. Test for heterogeneity, using Likelihood ratio test

3. Excluding those with unknown mode of delivery.

4. Limited to livebirths only

5. Limited analysis to those whose gestational age  $\geq$  35 weeks, with known data on mode of delivery and birth hospital records.

Supplemental Table 2: Association between history of uterine fibroids and adverse pregnancy outcomes among deliveries by all women aged  $\geq 18$  in Massachusetts between October 1, 2013-December 31, 2017, stratified by history of subfertility/infertility treatment

|                                              | No history of uterine fibroids |      | History of uterine fibroids |      | aRR (95% CI) <sup>1</sup> | P-value, test for heterogeneity <sup>2</sup> |
|----------------------------------------------|--------------------------------|------|-----------------------------|------|---------------------------|----------------------------------------------|
|                                              | n                              | %    | n                           | %    |                           |                                              |
| <b>Gestational Diabetes</b>                  |                                |      |                             |      |                           |                                              |
| Non-infertile                                | 4,903                          | 7.2  | 233                         | 10.5 | 1.07 (0.95-1.22)          | 0.10                                         |
| Subfertility/infertility                     | 1,124                          | 9.1  | 116                         | 10.4 | 0.95 (0.79-1.15)          |                                              |
| ART                                          | 689                            | 10.1 | 115                         | 13.2 | 1.05 (0.87-1.27)          |                                              |
| <b>PIH/Eclampsia/Preeclampsia</b>            |                                |      |                             |      |                           |                                              |
| Non-infertile                                | 6,621                          | 9.7  | 254                         | 11.4 | 1.13 (1.00-1.28)          | 0.16                                         |
| Subfertility/infertility                     | 1,366                          | 11.1 | 142                         | 12.8 | 1.07 (0.91-1.26)          |                                              |
| ART                                          | 1,130                          | 16.6 | 140                         | 16.1 | 1.12 (1.02-1.24)          |                                              |
| <b>Cesarean Section<sup>3</sup></b>          |                                |      |                             |      |                           |                                              |
| Non-infertile                                | 19,878                         | 29.0 | 880                         | 39.5 | 1.16 (1.10-1.22)          | 0.76                                         |
| Subfertility/infertility                     | 4,363                          | 35.4 | 519                         | 46.7 | 1.15 (1.07-1.23)          |                                              |
| ART                                          | 3,195                          | 46.9 | 522                         | 59.9 | 1.13 (1.06-1.21)          |                                              |
| <b>Placental abnormalities</b>               |                                |      |                             |      |                           |                                              |
| Non-infertile                                | 1,647                          | 2.4  | 65                          | 2.9  | 1.13 (0.89-1.45)          | 0.49                                         |
| Subfertility/infertility                     | 375                            | 3.0  | 49                          | 4.4  | 1.40 (1.04-1.89)          |                                              |
| ART                                          | 411                            | 6.0  | 76                          | 8.7  | 1.26 (1.04-1.52)          |                                              |
| <b>Small for gestational age<sup>4</sup></b> |                                |      |                             |      |                           |                                              |
| Non-infertile                                | 4,642                          | 6.9  | 154                         | 7.0  | 1.09 (0.93-1.28)          | 0.03                                         |
| Subfertility/infertility                     | 962                            | 7.8  | 73                          | 6.6  | 0.88 (0.70-1.12)          |                                              |
| ART                                          | 732                            | 9.8  | 65                          | 6.8  | 0.72 (0.55-0.94)          |                                              |
| <b>Low Birthweight (&lt;2500 grams)</b>      |                                |      |                             |      |                           |                                              |
| Non-infertile                                | 3,410                          | 4.9  | 151                         | 6.7  | 1.29 (1.10-1.52)          | 0.01                                         |
| Subfertility/infertility                     | 1,030                          | 8.1  | 95                          | 8.3  | 1.04 (0.85-1.28)          |                                              |

|                                                       |                          |       |      |     |      |                  |      |
|-------------------------------------------------------|--------------------------|-------|------|-----|------|------------------|------|
|                                                       | ART                      | 1,329 | 17.2 | 163 | 16.7 | 0.95 (0.81-1.11) |      |
| <b>Preterm Birth (&lt;37 weeks)</b>                   |                          |       |      |     |      |                  |      |
|                                                       | Non-infertile            | 4,091 | 5.9  | 171 | 7.6  | 1.19 (1.02-1.39) |      |
|                                                       | Subfertility/infertility | 1,195 | 9.5  | 124 | 11.0 | 1.17 (0.98-1.40) | 0.55 |
|                                                       | ART                      | 1,516 | 19.9 | 218 | 22.5 | 1.15 (1.00-1.32) |      |
| <b>Neonatal prolonged hospital stay<sup>4,5</sup></b> |                          |       |      |     |      |                  |      |
|                                                       | Non-infertile            | 2,540 | 3.8  | 101 | 4.7  | 1.16 (0.95-1.41) |      |
|                                                       | Subfertility/infertility | 584   | 4.8  | 49  | 4.5  | 0.92 (0.69-1.23) | 0.25 |
|                                                       | ART                      | 627   | 9.0  | 93  | 10.6 | 1.12 (0.89-1.41) |      |

1. Crude and adjusted relative risk approximated using general estimating equations with a log link and poisson distribution to take into account multiple deliveries by the same women; multivariate models adjusted for maternal age (continuous), body mass index (<25.0, 25.0+, unknown), race (non-Hispanic White, other race/ethnicity, unknown), education (high school + some college, completed college, unknown), plurality (singleton, multiples), and birth year (2013-2017 ordinal categorical variable).

2. Test for heterogeneity, using Likelihood ratio test

3. Excluding those with unknown mode of delivery.

4. Limited to livebirths only

5. Limited analysis to those whose gestational age  $\geq$  35 weeks, with known data on mode of delivery and birth hospital records.

Supplemental Table 3: Association between history of pelvic pain prior to delivery and adverse pregnancy outcomes among deliveries to women aged  $\geq 18$  in Massachusetts between October 1, 2013-December 31, 2017

|                                                         | No history of pelvic pain |       | History of pelvic pain |       | Relative Risk (95% Confidence Interval) <sup>1</sup> |                       |                       |
|---------------------------------------------------------|---------------------------|-------|------------------------|-------|------------------------------------------------------|-----------------------|-----------------------|
|                                                         | n                         | %     | n                      | %     | Crude                                                | Adjusted <sup>1</sup> | Adjusted <sup>2</sup> |
| Total deliveries                                        | 77,179                    | 100.0 | 14,646                 | 100.0 |                                                      |                       |                       |
| <b>Maternal Outcomes</b>                                |                           |       |                        |       |                                                      |                       |                       |
| Gestational diabetes                                    | 6,019                     | 7.8   | 1,161                  | 7.9   | 1.03 (0.97-1.09)                                     | 0.97 (0.91-1.03)      | 0.96 (0.91-1.02)      |
| PIH <sup>3</sup> /Eclampsia/Preeclampsia                | 7,990                     | 10.4  | 1,663                  | 11.4  | 1.09 (1.03-1.14)                                     | 1.01 (0.96-1.06)      | 1.01 (0.96-1.07)      |
| Caesarean Delivery <sup>4</sup>                         | 24,208                    | 31.4  | 5,149                  | 35.2  | 1.11 (1.09-1.14)                                     | 1.10 (1.07-1.12)      | 1.10 (1.07-1.12)      |
| Placental abnormalities <sup>5</sup>                    | 2,173                     | 2.8   | 450                    | 3.1   | 1.09 (0.98-1.20)                                     | 1.15 (1.03-1.27)      | 1.15 (1.03-1.27)      |
| <b>Infant outcomes</b>                                  |                           |       |                        |       |                                                      |                       |                       |
| Total infants                                           | 79,029                    | 100.0 | 15,048                 | 100.0 |                                                      |                       |                       |
| Total livebirths                                        | 78,809                    | 99.7  | 15,010                 | 99.7  |                                                      |                       |                       |
| Small for gestational age <sup>6</sup>                  | 5,567                     | 7.2   | 1,061                  | 7.2   | 0.99 (0.93-1.06)                                     | 1.00 (0.93-1.06)      | 1.00 (0.93-1.06)      |
| Low birthweight (<2500 grams)                           | 5,120                     | 6.5   | 1,058                  | 7.0   | 0.92 (0.82-1.03)                                     | 1.04 (0.98-1.11)      | 1.04 (0.97-1.11)      |
| Prematurity (<37 weeks)                                 | 5,957                     | 7.6   | 1,358                  | 9.1   | 1.04 (0.82-1.32)                                     | 1.14 (1.08-1.21)      | 1.14 (1.08-1.21)      |
| Neonatal mortality <sup>6,7,8</sup>                     | 144                       | 0.2   | 44                     | 0.3   | 0.86 (0.41-1.82)                                     | 1.52 (1.03-2.24)      | 1.09 (0.80-1.49)      |
| Neonatal prolonged hospital stay <sup>6,8,9</sup>       | 3,333                     | 4.4   | 661                    | 4.6   | 1.05 (0.96-1.14)                                     | 1.01 (0.93-1.10)      | 0.96 (0.88-1.04)      |
| <b>Neonatal Conditions</b>                              |                           |       |                        |       |                                                      |                       |                       |
| Infectious disease conditions <sup>8,10</sup>           | 726                       | 1.2   | 145                    | 1.4   | 1.21 (1.01-1.44)                                     | 1.19 (1.00-1.43)      | 1.08 (0.90-1.30)      |
| Cardiovascular conditions <sup>8,10</sup>               | 1,336                     | 2.1   | 279                    | 2.7   | 1.24 (1.09-1.42)                                     | 1.08 (0.90-1.30)      | 1.11 (0.97-1.26)      |
| Respiratory conditions <sup>8,10</sup>                  | 10,268                    | 16.3  | 1,956                  | 18.7  | 1.15 (1.10-1.20)                                     | 1.12 (1.07-1.18)      | 1.08 (1.03-1.13)      |
| Gastrointestinal/Nutritional Conditions <sup>8,10</sup> | 3,918                     | 6.2   | 777                    | 7.4   | 1.21 (1.11-1.32)                                     | 1.09 (1.01-1.18)      | 1.00 (0.91-1.09)      |
| Neurologic conditions <sup>8,10</sup>                   | 2,531                     | 4.0   | 432                    | 4.1   | 1.03 (0.93-1.14)                                     | 0.99 (0.89-1.09)      | 0.96 (0.87-1.06)      |
| Hematologic conditions <sup>8,10</sup>                  | 8,423                     | 13.4  | 1,814                  | 17.4  | 1.32 (1.26-1.38)                                     | 1.03 (0.99-1.08)      | 1.00 (0.95-1.05)      |

1. Crude and adjusted relative risk approximated using general estimating equations with a log link and poisson distribution to take into account multiple deliveries by the same women; multivariate models adjusted for maternal age (continuous), body mass index (<25.0, 25.0+, unknown), race (non-Hispanic White, other race/ethnicity, unknown), education (high school + some college, completed college, unknown), plurality (singleton, multiples), and birth year (2013-2017 ordinal categorical variable).
2. Relative risk additionally adjusted for history of hypertension and diabetes.
3. PIH: Pregnancy induced hypertension
4. Excluding those with unknown mode of delivery
5. Placental abnormalities include: ICD 641.0-641.2, 663.5, 667.0, 762.1, O45, P02.1, O43.21, O44, O69
6. Limited to livebirths only
7. Neonatal death= 0-27 days after birth
8. Limited analysis to those whose gestational age  $\geq 35$  weeks, with known data on mode of delivery and birth hospital records. Prolonged stay defined as  $> 3$  days for vaginal delivery or  $> 5$  days for cesarean delivery
9. Relative risk additionally adjusted for gestational age (continuous variable, range 17-44), excluding those with unknown GA.
10. Limited to livebirths October 1, 2013-December 31, 2016 (to allow capture of conditions up to one-year after birth)
